# Supplementary material for: Broadening the Voltage Window of 3D-Printed MXene Micro-Supercapacitors with a Hybridized Electrolyte
Source: MDPI journal article supplement (doi:10.3390/molecules29061393), 2024-03-20
Supplement: s1 [file s1]

## Supporting Information

# Broadening the Voltage Window of 3D-Printed MXene Micro-Supercapacitors with a Hybridized Electrolyte

Xin Jiang <sup>1,2</sup>, Haowen Jia <sup>1</sup>, Xuan Chen <sup>1</sup>, Jiajia Li <sup>1</sup>, Yanling Chen <sup>1</sup>, Jin Jia <sup>1,\*</sup>, Guangzhen Zhao <sup>1</sup>, Lianghao Yu <sup>1</sup>, Guang Zhu <sup>1,\*</sup> and Yuanyuan Zhu <sup>1,\*</sup>

<sup>1</sup> Key Laboratory of Spin Electron and Nanomaterials of Anhui Higher Education Institutes, Suzhou University, Suzhou 234000, China; jiangxinty@163.com (X.J.); jiahaowen100823@163.com (H.J.); cxuan0221@163.com (X.C.); lijiajia040326@163.com (J.L.); chenyanl0516@163.com (Y.C.); zhaogzgold@126.com (G.Z.); yulianghao789@163.com (L.Y.)

<sup>2</sup> School of Mechanics and Optoelectronic Physics, Anhui University of Science and Technology, Huainan 232001, China

\* Correspondence: jjiajin@ahszu.edu.cn (J.J.); guangzhu@ahszu.edu.cn (G.Z.); zhuyy@ahszu.edu.cn (Y.Z.)



### Calculations:

The capacitance of the cross-linked electrode can be calculated using the cyclic voltammetry (CV) and galvanostatic charge-discharge (GCD) curves. The specific calculation formulas are provided below:

$$C_{CV} = \frac{1}{v \times \Delta V} \int I(V) dV \quad (S1)$$

$$C_{GCD} = \frac{I \times \Delta t}{\Delta V} \quad (S2)$$

The current during the cyclic voltammetry (CV) tests, denoted as  $I(V)$  (mA), was measured. The scan rate, represented as  $v$  ( $V s^{-1}$ ), and the discharge current, denoted as  $I$  (mA), were recorded. The discharge time, denoted as  $\Delta t$  (s), and the voltage range of the discharge, denoted as  $\Delta V$  (V), were also noted.

The calculation formula for the specific capacitance of the dual-electrode device is provided below:

$$C_{areal} = \frac{C}{A_{device}} \quad (S3)$$

The areal capacitance of the dual-electrode device, denoted as  $C_{areal}$  ( $mF cm^{-2}$ ), was determined, while  $A_{device}$  ( $cm^{-2}$ ) represents the electrode area of the dual-electrode configuration.

The calculation formulas for the areal energy density,  $E_A$  ( $\mu Wh cm^{-2}$ ) (Equation (S4)), and the areal power density,  $P_A$  ( $\mu W cm^{-2}$ ) (Equation (S5)), of the device are provided as follows:

$$E_A = \frac{C_{areal}}{2 \times 3600} \times \Delta V^2 \quad (S4)$$

$$P_A = \frac{E_A}{\Delta t} \times 3600 \quad (S5)$$

Here,  $\Delta V$  (V),  $\Delta t$  (s), and  $C_{areal}$  ( $mF cm^{-2}$ ) are as described above.



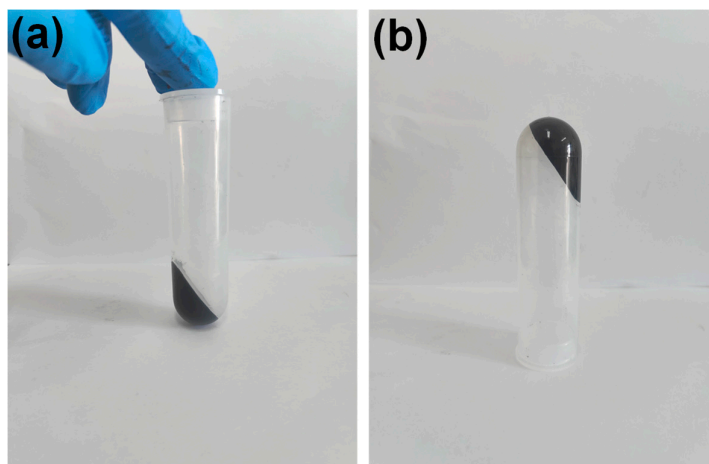

**Figure S1.** Optical images of aqueous MXene ink: (a) normal and (b)inverted orientations.

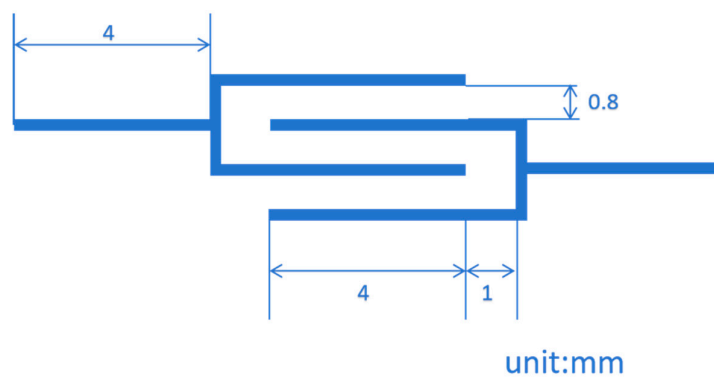

**Figure S2.** Print the specific parameters of the electrode.



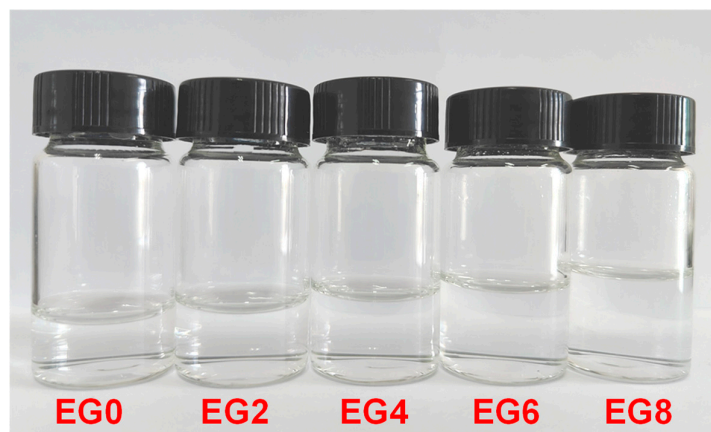

**Figure S3.** Optical images of EG/NaCl electrolytes with varying amounts of EG.

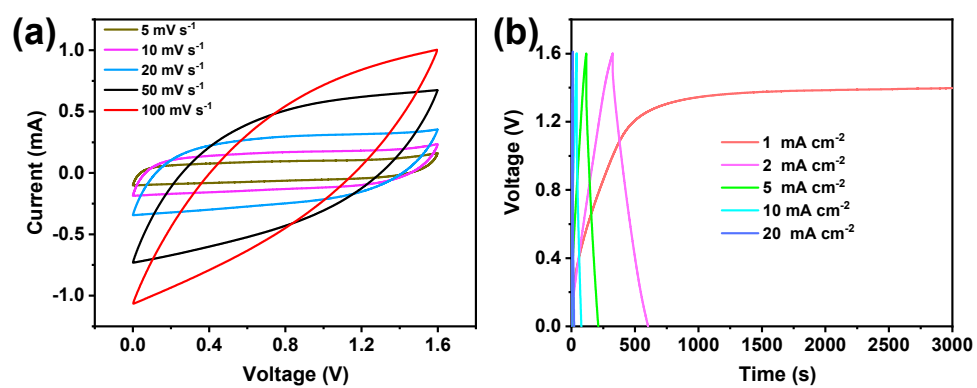

**Figure S4.** Electrochemical performance of MSCs-0. (a) CV curves at different scan rates and (b) GCD profiles at various current densities.



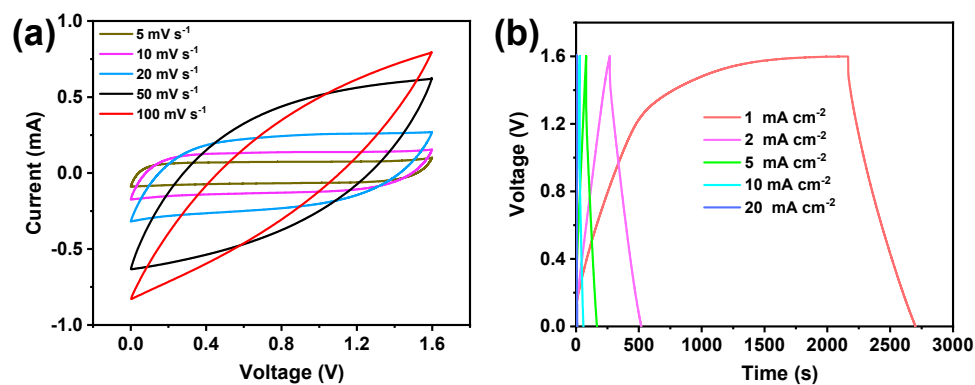

**Figure S5.** Electrochemical performance of MSCs-2. (a) CV curves at different scan rates and (b) GCD profiles at various current densities.

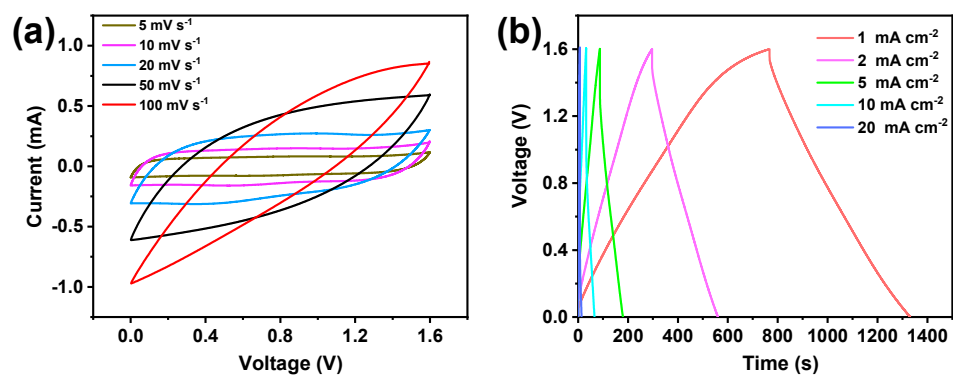

**Figure S6.** Electrochemical performance of MSCs-4. (a) CV curves at different scan rates and (b) GCD profiles at various current densities.



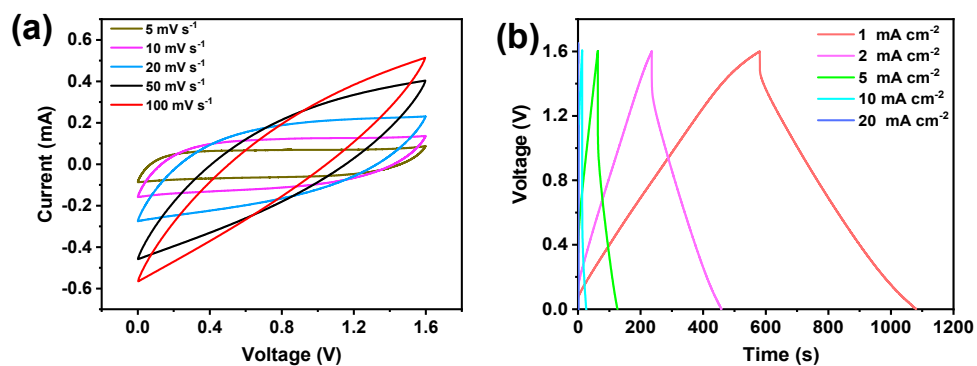

**Figure S7.** Electrochemical performance of MSCs-8. (a) CV curves at different scan rates and (b) GCD profiles at various current densities.

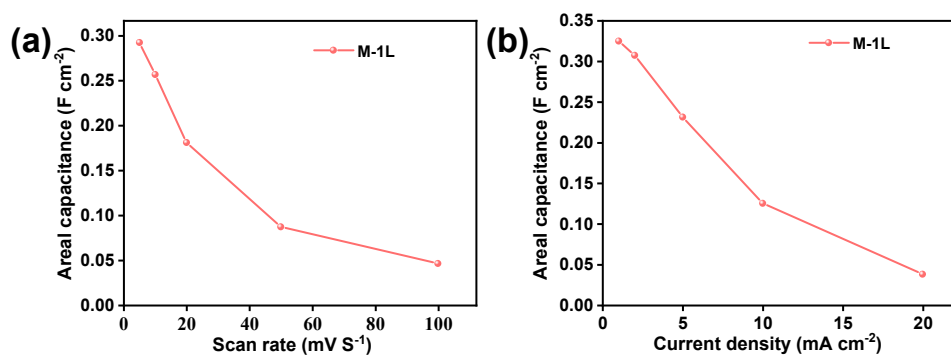

**Figure S8.** The actual capacitance of MSCs-6 in different test methods: (a) scan rate and (b) current density.



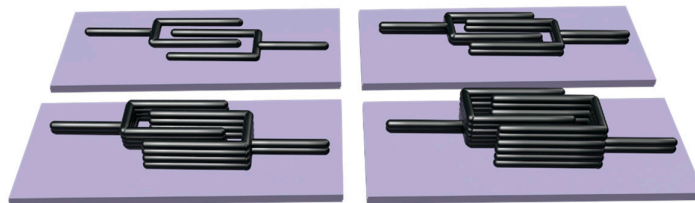

**Figure S9.** Schematic representation of MXene-MSCs with different printed layers.

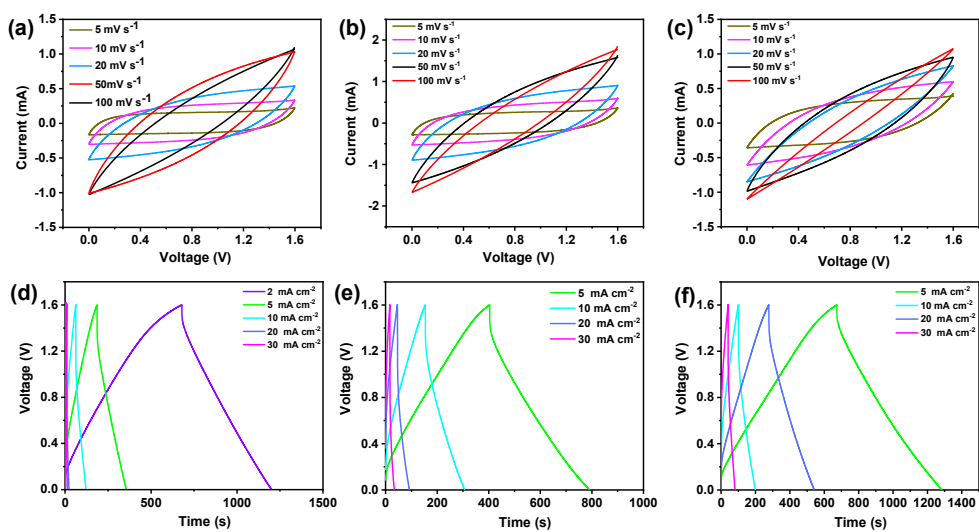

**Figure S10.** Electrochemical properties of MXene-MSCs with different printed layers.

CV curves of (a) M-2L, (b) M-4L, and (c) M-6L at different scan rates. GCD profiles of (d) M-2L, (e) M-4L, and (f) M-6L at various current densities.



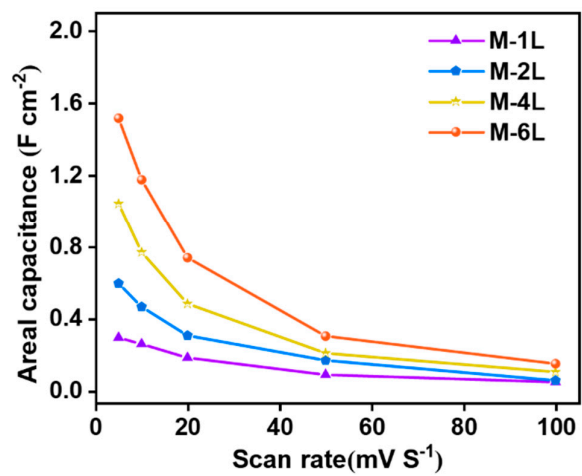

**Figure S11.** Specific capacitance of MXene-MSCs with different printed layers at scan rates ranging from 5 to 100 mV s<sup>-1</sup>.

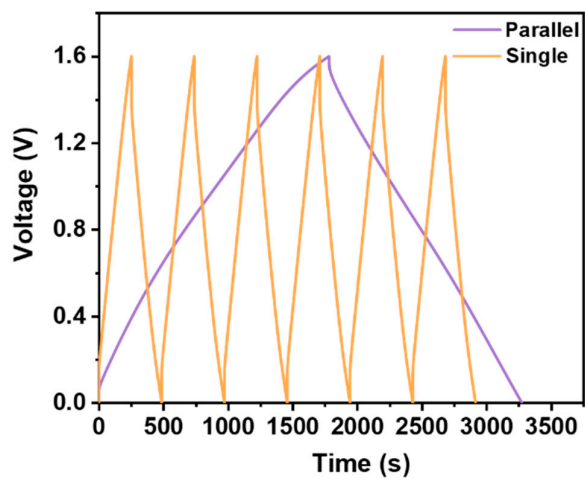

**Figure S12.** GCD profiles of six parallel MSCs-6 at a current density of 2 mA cm<sup>-2</sup>.



**Table S1.** Comparison of the energy density and power density of MXene-based supercapacitors between this work and previous work

| Materials                                                       | Electrolytes                       | Voltage<br>(V) | C <sub>A</sub><br>(mF<br>cm <sup>-2</sup> ) | Energy<br>density<br>(μWh cm <sup>-2</sup> ) | Power<br>density<br>(mW cm <sup>-2</sup> ) | Refs.        |
|-----------------------------------------------------------------|------------------------------------|----------------|---------------------------------------------|----------------------------------------------|--------------------------------------------|--------------|
| Ti <sub>3</sub> C <sub>2</sub> T <sub>x</sub> /rGO              | PVA/H <sub>2</sub> SO <sub>4</sub> | 0.6            | 34.6                                        | 2.18                                         | 0.06                                       | [1]          |
| Ti <sub>3</sub> C <sub>2</sub> T <sub>x</sub> /Be <sup>2+</sup> | ZnSO <sub>4</sub> -gel             | 0.6            | 77.2                                        | 0.12                                         | 3.86                                       | [2]          |
| Ti <sub>3</sub> C <sub>2</sub> T <sub>x</sub> /SA-Fe            | PVA/H <sub>2</sub> SO <sub>4</sub> | 0.6            | 123.8                                       | 8.44                                         | 0.034                                      | [3]          |
| Ti <sub>3</sub> C <sub>2</sub> T <sub>x</sub> sediment          | PVA/H <sub>2</sub> SO <sub>4</sub> | 0.6            | 158                                         | 1.64                                         | 0.778                                      | [4]          |
| Ti <sub>3</sub> C <sub>2</sub> T <sub>x</sub> MXene             | PVA/H <sub>3</sub> PO <sub>4</sub> | 0.6            | ~225                                        | 9.7                                          | 1.875                                      | [5]          |
| Polyster/MXene                                                  |                                    |                |                                             |                                              |                                            |              |
| Ti <sub>3</sub> C <sub>2</sub> T <sub>x</sub>                   | PVA/H <sub>2</sub> SO <sub>4</sub> | 0.6            | 18.39                                       | 0.67                                         | 0.09                                       | [6]          |
| Ti <sub>3</sub> C <sub>2</sub> T <sub>x</sub> /CNT              | PVA/H <sub>2</sub> SO <sub>4</sub> | 0.6            | 30.76                                       | 8.37                                         | 0.017                                      | [7]          |
| Ti <sub>3</sub> C <sub>2</sub> T <sub>x</sub>                   | PVA/H <sub>2</sub> SO <sub>4</sub> | 0.6            | 61                                          | 0.63                                         | 0.33                                       | [8]          |
| Ti <sub>3</sub> C <sub>2</sub> T <sub>x</sub> @PTC-12h          | PVA/H <sub>2</sub> SO <sub>4</sub> | 0.6            | 20.8                                        | 1.04                                         | 0.03                                       | [9]          |
| M-1L                                                            | 1 m<br>NaCl/EG                     | 1.6            | 329                                         | 116.8                                        | 0.798                                      | This<br>work |
| M-6L                                                            | 1 m<br>NaCl/EG                     | 1.6            | 1903                                        | 675                                          | 3.933                                      | This<br>work |

PTC: polylactic acid (PLA) and hermoplastic polyurethane (TPU) as a matrix and carbon black (CB).



## References:

1. Yue, Y.; Liu, N.; Ma, Y.; Wang, S.; Liu, W.; Luo, C.; Zhang, H.; Cheng, F.; Rao, J.; Hu, X.; Su, J.; Gao, Y., Highly self-healable 3D microsupercapacitor with MXene-graphene composite aerogel. *ACS Nano* **2018**, 12, (5), 4224-4232.
2. Li, S.; Shi, Q.; Li, Y.; Yang, J.; Chang, T. H.; Jiang, J.; Chen, P. Y., Intercalation of metal ions into  $\text{Ti}_3\text{C}_2\text{T}_x$  MXene electrodes for high-area-capacitance microsupercapacitors with neutral multivalent electrolytes. *Adv. Funct. Mater.* **2020**, 30, (40), 2003721.
3. Wang, G.; Zhang, R.; Zhang, H.; Cheng, K., Aqueous MXene inks for inkjet-printing microsupercapacitors with ultrahigh energy densities. *J. Colloid Interface Sci.* **2023**, 645, 359-370.
4. Abdolhosseinzadeh, S.; Schneider, R.; Verma, A.; Heier, J.; Nuesch, F.; Zhang, C. J., Turning trash into treasure: additive free MXene sediment inks for screen-printed micro-supercapacitors. *Adv. Mater.* **2020**, 32, (17), 2000716.
5. Shao, Y.; Wei, L.; Wu, X.; Jiang, C.; Yao, Y.; Peng, B.; Chen, H.; Huangfu, J.; Ying, Y.; Zhang, C. J.; Ping, J., Room-temperature high-precision printing of flexible wireless electronics based on MXene inks. *Nat. Commun.* **2022**, 13, (1), 3223.
6. Shao, W.; Tebyetekerwa, M.; Marriam, I.; Li, W.; Wu, Y.; Peng, S.; Ramakrishna, S.; Yang, S.; Zhu, M., Polyester@MXene nanofibers-based yarn electrodes. *J. Power Sources* **2018**, 396, 683-690.
7. Zhao, J.; Zhang, Y.; Huang, Y.; Zhao, X.; Shi, Y.; Qu, J.; Yang, C.; Xie, J.; Wang,



- J.; Li, L.; Yan, Q.; Hou, S.; Lu, C.; Xu, X.; Yao, Y., Duplex printing of all-in-one integrated electronic devices for temperature monitoring. *J. Mater. Chem. A* **2019**, 7, (3), 972-978.
8. Zhang, C.; Kremer, M. P.; Seral-Ascaso, A.; Park, S. H.; McEvoy, N.; Anasori, B.; Gogotsi, Y.; Nicolosi, V., Stamping of flexible, coplanar micro-supercapacitors using MXene inks. *Adv. Funct. Mater.* **2018**, 28, (9), 1705506.
9. Zhu, G.; Hou, Y.; Lu, J.; Zhang, H.; Zhuang, Z.; Baig, M. M.; Khan, M. Z.; Akram, M. A.; Dong, S.; Liu, P.; Ge, X.; Zhang, Y., MXene decorated 3D-printed carbon black-based electrodes for solid-state micro-supercapacitors. *J. Mater. Chem. A* **2023**, 11, (46), 25422-25428.
